# Supplementary material for: Long-wavelength TCF-based fluorescence probes for the detection and intracellular imaging of biological thiols
Source: PubMed Central journal article supplement (PMC5944426; doi:10.1039/c8cc01661e), 2018-04-17
Supplement: CC-054-C8CC01661E-s001.pdf [file CC-054-C8CC01661E-s001.pdf]

## Supplementary Information

### **Long-wavelength fluorescent TCF-based probes for the detection and intracellular imaging of biological thiols**

Adam C. Sedgwick<sup>a\*</sup>, Jordan E. Gardiner<sup>a</sup>, Gyoungmi Kim<sup>b</sup>, Maksims Yevglevskis<sup>c</sup>, Matthew D. Lloyd<sup>c</sup>, Toby A. Jenkins<sup>a</sup>, Steven D. Bull<sup>a\*</sup>, Juyoung Yoon<sup>b\*</sup> and Tony D. James<sup>a\*</sup>

<sup>a</sup>Department of Chemistry, University of Bath, Bath, BA2 7AY, U.K.

<sup>b</sup>Department of Chemistry and Nano science, Ewha Womans University, Seoul 120-750, Korea.

<sup>c</sup>Drug & Target Development, Department of Pharmacy & Pharmacology, University of Bath, Claverton Down, Bath, BA2 7AY, UK.

Email: T.D.James@bath.ac.uk, S.D.Bull@bath.ac.uk, jyoon@ewha.ac.kr

### **Content**

- 1. Reaction mechanism**
- 2. UV analysis**
- 3. Stability of the fluorophores towards GSH**
- 4. Fluorescence analysis**
- 5. Cell viability**
- 6. Cell imaging**
- 7. Photobleaching analysis**
- 8. Quantum yield and Limit of detection**
- 9. Experimental**
- 10. NMR**
- 11. References**

## 1. Reaction mechanism

As previously reported<sup>1,2</sup> the system has an internal charge transfer (ICT) donor- $\pi$ -acceptor (D- $\pi$ -A) structure. Before the addition of GSH, it is a pull-pull system. The addition of GSH leads to the deprotection of the phenol by reacting with the dinitrobenzenesulfonyl group. This produces the push-pull ICT system with a colorimetric and fluorescence response.

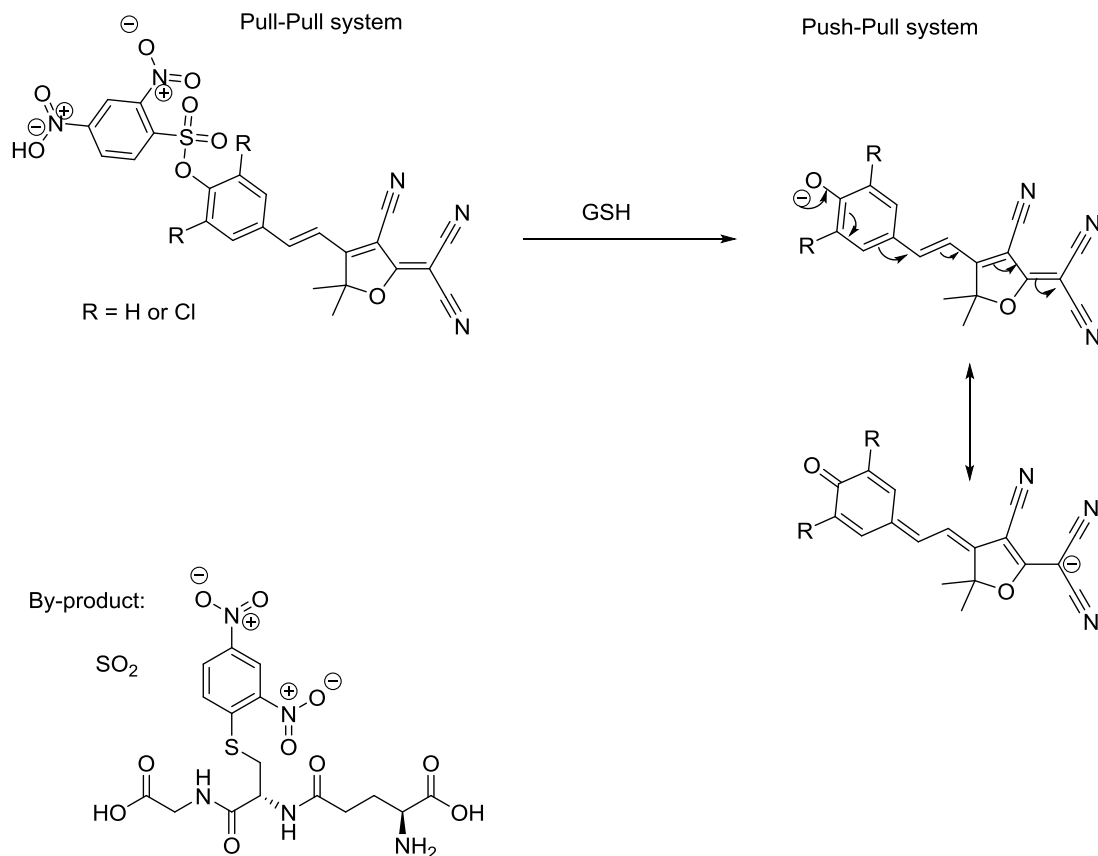

**Scheme 1.** Reactivity of the TCF-Based fluorescent probes towards GSH

## 2. UV analysis

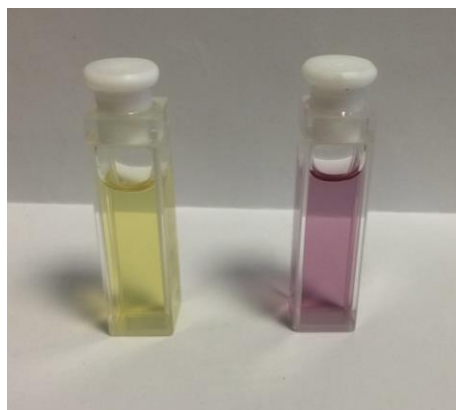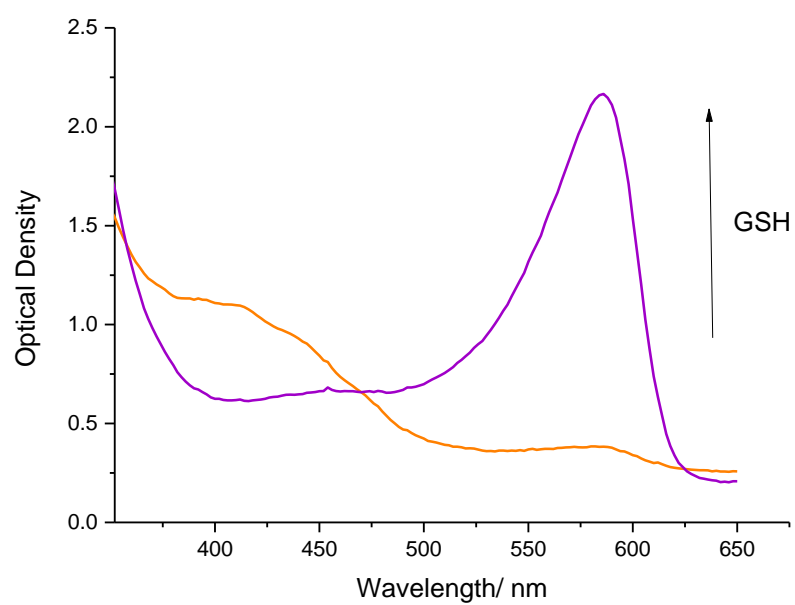

**Fig S1.** UV Spectra of TCF-GSH (10  $\mu$ M) before (black) and after (purple) addition of GSH (50  $\mu$ M) in PBS buffer solution, 20 % v/v DMSO, pH 8.00 at 25  $^{\circ}$ C. Wait 30 mins before measurement

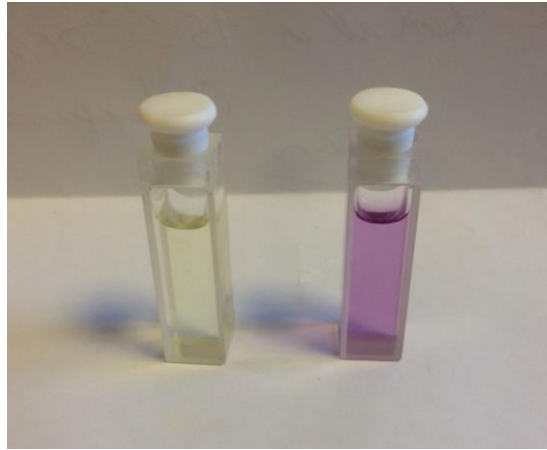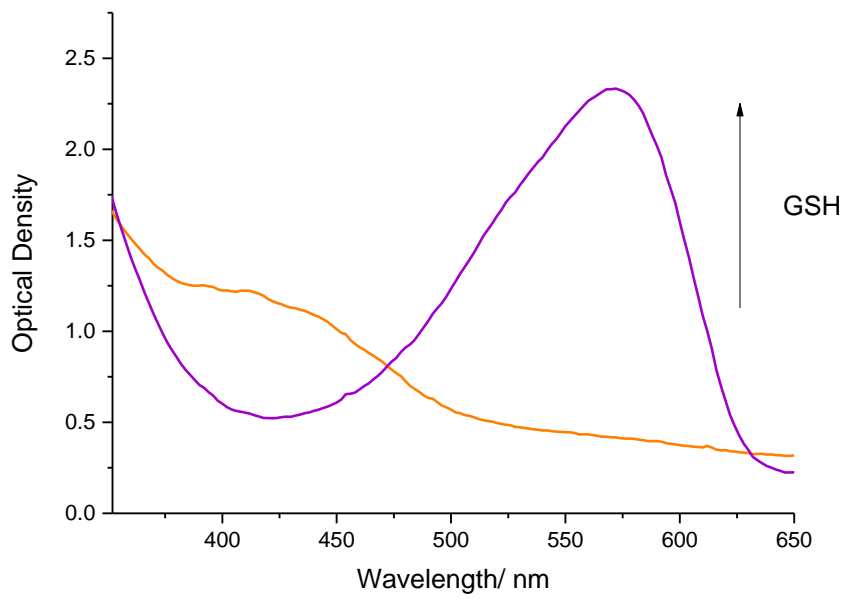

**Fig S2.** UV Spectra of TCFCI-GSH (10  $\mu$ M) before (orange) and after (purple) addition of GSH (200  $\mu$ M) in PBS buffer solution, 20 % v/v DMSO, pH 8.00 at 25  $^{\circ}$ C. Wait 30 mins before measurement

### 3. Fluorescence analysis

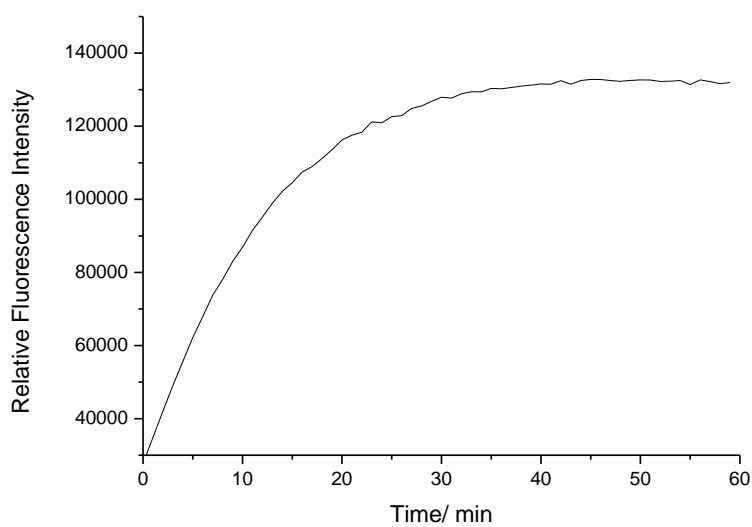

**Fig. S3.** Fluorescence change of **TCF-GSH** (5 μM) against time with the addition of **GSH** (100 μM) in PBS buffer solution, 20 % v/v DMSO, pH 8.00 at 25 °C.  $\lambda_{ex} = 560 \pm 15 \text{ nm}$  /  $\lambda_{em} = 610 \pm 20 \text{ nm}$

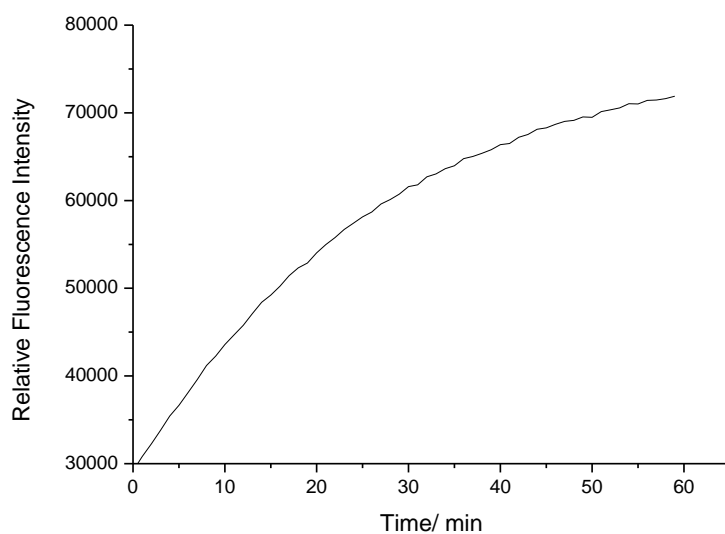

**Fig S4.** Fluorescence change of **TCFCl-GSH** (5 μM) against time with the addition of **GSH** (100 μM) in PBS buffer solution, 20 % v/v DMSO, pH 8.00 at 25 °C.  $\lambda_{ex} = 560 \pm 15 \text{ nm}$  /  $\lambda_{em} = 610 \pm 20 \text{ nm}$

#### 4. Stability of TCF fluorophores towards GSH

As shown in the manuscript (Fig. 2), at higher GSH concentrations the fluorescence intensity began to decrease. Therefore, we investigated the stability of the TCF phenols towards the addition of GSH. As illustrated below in Fig. S11, there is a clear colour change from purple to brown with the addition of 2 mM GSH. A clear decrease in fluorescence intensity was observed with the addition of GSH (Fig. S4)

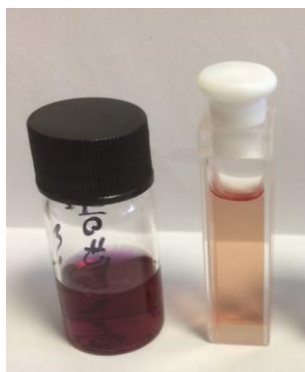

**Fig S5.** Vial on left – TCF-OH – no GSH. Cuvette on the right TCF-OH – with GSH

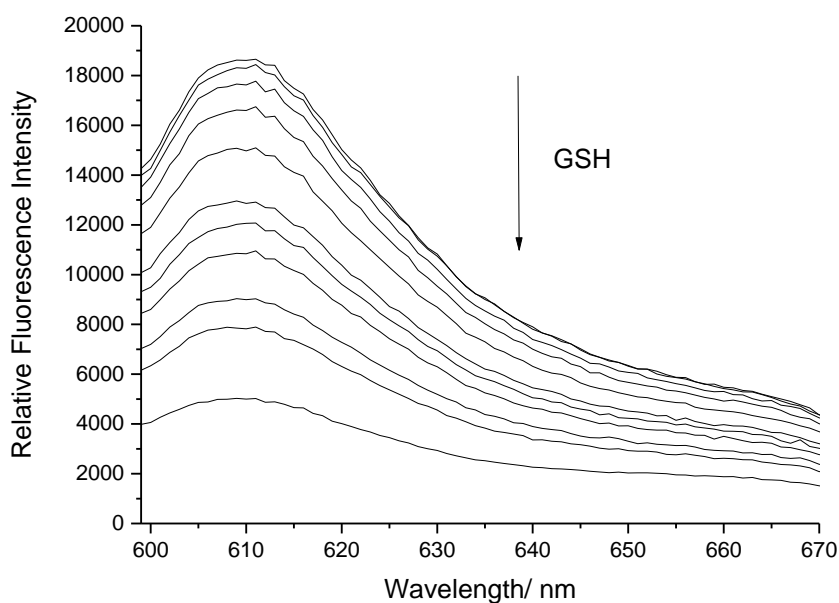

**Fig S6.** Fluorescence spectra of TCF-OH (5 μM) with the addition of GSH (0 – 400 μM) in PBS buffer solution, 20 % v/v DMSO, pH 8.00 at 25 °C.  $\lambda_{ex} = 560 \pm 15$  nm

Interestingly, only a slight colour change was observed for **TCFCI-OH** with the addition of 2 mM GSH (Fig. S13).

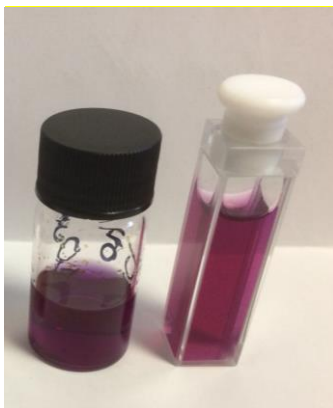

**Fig S7.** Vial on left – **TCFCI-OH** – no **GSH**. Cuvette on the right **TCFCI-OH** – with **GSH**

Despite only a small change in colour, a decrease in fluorescence intensity with the addition of GSH to **TCFCI-OH** – Fig. S14. However, in comparison to TCF-OH, there was smaller change in the fluorescence intensity indicating a greater stability to GSH.

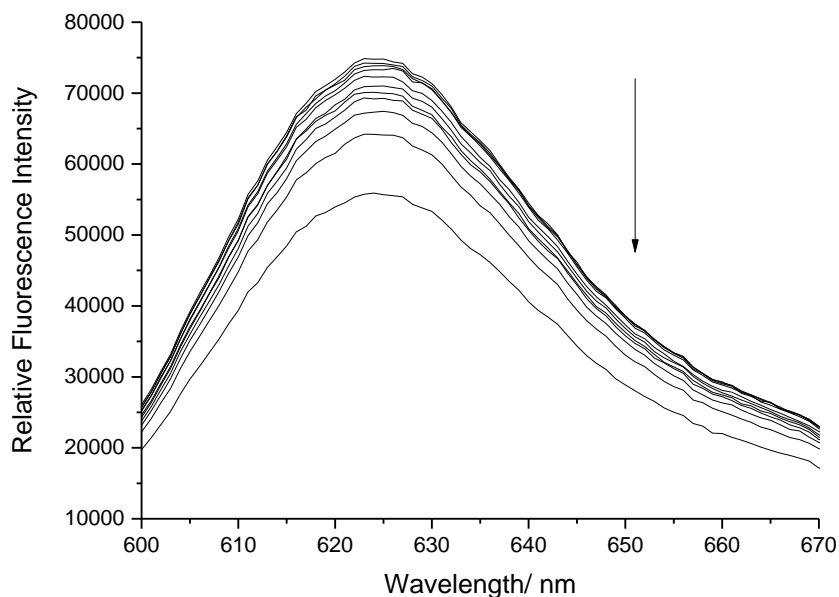

**Fig S8.** Fluorescence spectra of **TCFCI-OH** (5 μM) with the addition of GSH (0 – 400 μM) in PBS buffer solution, 20 % v/v DMSO, pH 8.00 at 25 °C.  $\lambda_{ex} = 560 \pm 15$  nm

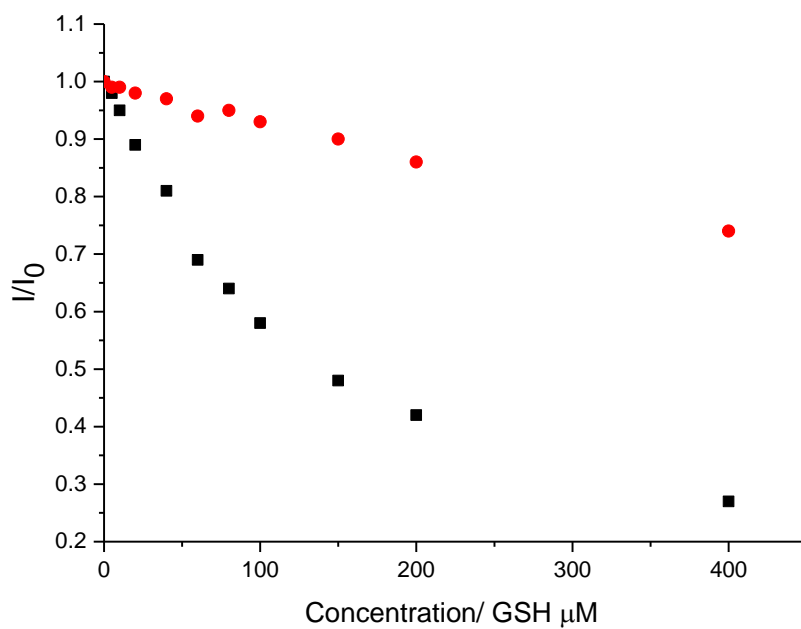

**Fig. S9.** Fluorescence intensity changes of **TCF-OH** ● (5 μM) and **TCFCI-OH** ■ (5 μM) with the addition of GSH (0 – 400 μM) in PBS buffer solution, 20 % v/v DMSO, pH 8.00 at 25 °C.  $\lambda_{\text{ex}} = 560 \pm 15 \text{ nm}$  /  $\lambda_{\text{em}} = 615 \text{ (TCF-OH) / 625 (TCFCI-OH) nm}$



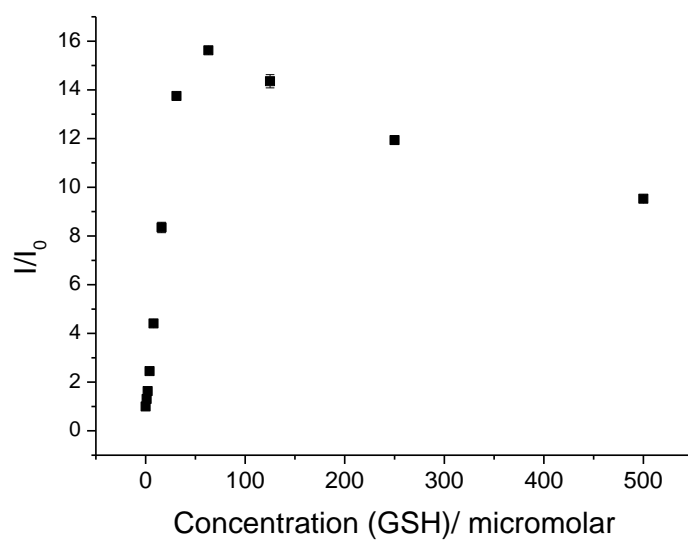

**Fig S10.** Fluorescence intensity change of **TCF-GSH** (5  $\mu\text{M}$ ) with the addition of GSH (0 – 500  $\mu\text{M}$ ) in PBS buffer solution, 20 % v/v DMSO, pH 8.00 at 25  $^{\circ}\text{C}$ .  $\lambda_{\text{ex}} = 560 \pm 15 \text{ nm}$  /  $\lambda_{\text{em}} = 615 \text{ nm}$

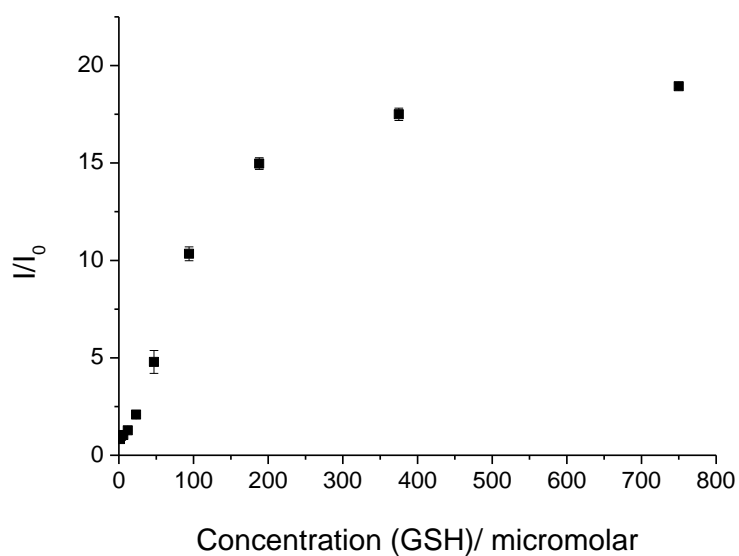

**Fig S11.** Fluorescence intensities change of **TCFCl-GSH** (5  $\mu\text{M}$ ) with the addition of GSH (0 – 750  $\mu\text{M}$ ) in PBS buffer solution, 20 % v/v DMSO, pH 8.00 at 25  $^{\circ}\text{C}$ .  $\lambda_{\text{ex}} = 560 \pm 15 \text{ nm}$  /  $\lambda_{\text{em}} = 625 \text{ nm}$

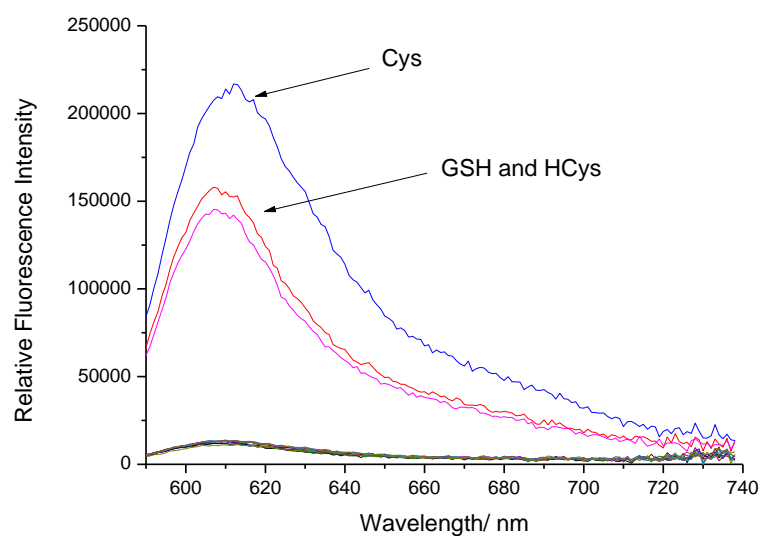

**Fig S12.** Fluorescence spectra of **TCF-GSH** (5  $\mu$ M) with the addition of GSH: Cys, HCys and various other amino acids in PBS buffer solution, 20 % v/v DMSO, pH 8.00 at 25  $^{\circ}$ C.  $\lambda_{ex}$  = 560  $\pm$  15 nm

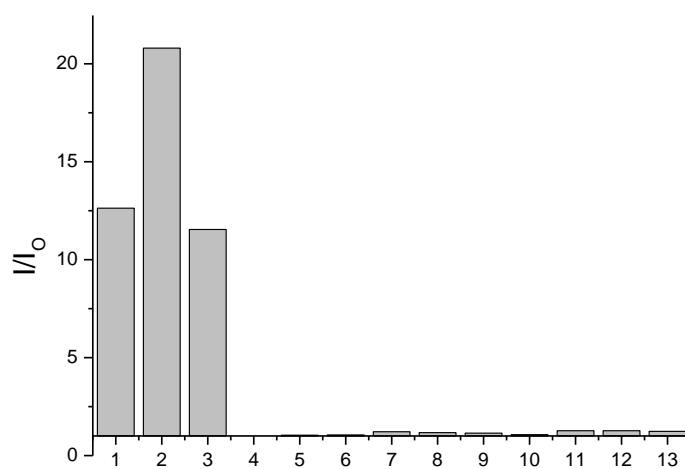

**Fig S13.** Selectivity bar chart of **TCF-GSH** (5  $\mu$ M) with the addition of 100  $\mu$ M GSH: Cys, HCys and various other amino acids (1 – GSH, 2 – Cys, 3 – Hcys, 4 – control, 5 – proline, 6 – glutamic acid, 7 – serine, 8 – Lysine, 9 – arginine, 10 – aspartic acid, 11 – Phenylalanine, 12 – valine, 13 – isoleucine) in PBS buffer solution, 20 % v/v DMSO, pH 8.00 at 25  $^{\circ}$ C.  $\lambda_{ex}$  = 560  $\pm$  15 nm/  $\lambda_{em}$  = 625 nm

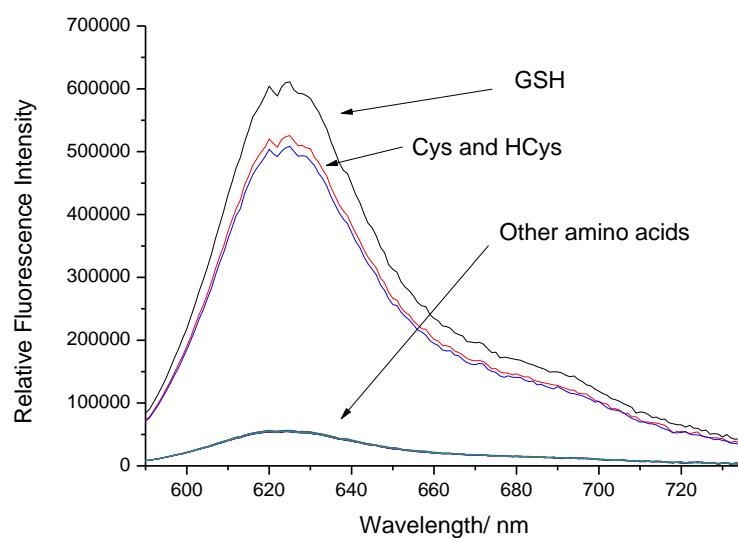

**Fig S14.** Fluorescence spectra of **TCFCI-GSH** (5  $\mu$ M) with the addition of GSH, Cys, HCys and various other amino acids in PBS buffer solution, 20 % v/v DMSO, pH 8.00 at 25  $^{\circ}$ C.  $\lambda_{ex}$  = 560  $\pm$  15 nm

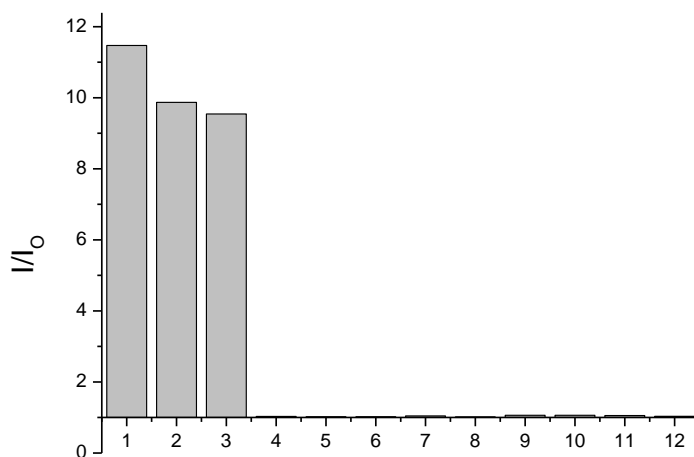

**Fig S15.** Selectivity bar chart of **TCFCI-GSH** (5  $\mu$ M) with the addition of 100  $\mu$ M GSH, Cys, HCys and various other amino acids (1 – GSH, 2 – Cys, 3 – Hcys, 4 – proline, 5 – serine, 6 – aspartic acid, 7 – lysine, 8 – valine, 9 – isoleucine, 10 – arginine, 11 – histidine, 12 – phenylalanine) in PBS buffer solution, 20 % v/v DMSO, pH 8.00 at 25  $^{\circ}$ C.  $\lambda_{ex}$  = 560  $\pm$  15 nm/  $\lambda_{em}$  = 625 nm

## 5. Cell viability

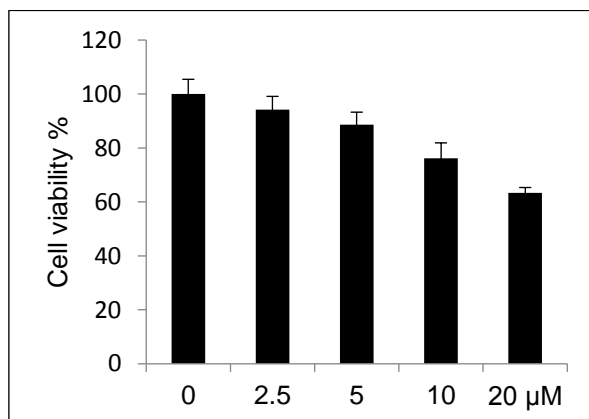

**Fig S16.** HeLa cells were incubated with each concentration of **TCF-GSH** for 24hr. Cell viability was assayed by MTT test. Results are expressed as mean  $\pm$  standard deviation of three independent experiments.

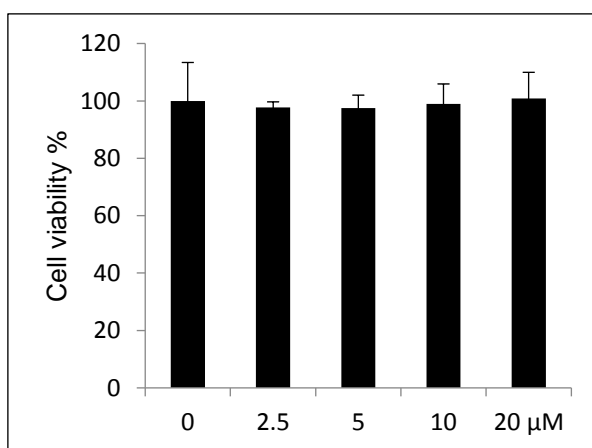

**Fig S17.** HeLa cells were incubated with each concentration of **TCFCl-GSH** for 24hr. Cell viability was assayed by MTT test. Results are expressed as mean  $\pm$  standard deviation of three independent experiments.

### Method

Cells were seeded in a 96-well plate with culture media. After overnight culture, cells were incubated with each concentration of sample for 24 h. To identify cell viability, reagents were removed and 0.5 mg/ml of MTT (Sigma) media was added to the cells and incubated for 4 hr at 37 °C CO<sub>2</sub> incubator and the produced formazan was dissolved in 0.1 ml of dimethylsulfoxide (DMSO) and read at OD 650 nm with a Spectramax Microwell plate reader. Absorbance was determined and the mean cell viability was calculated as a percentage of the mean vehicle control and experiments were carried out in three independent tests.

## 6. Cell imaging

HeLa (human cervix adenocarcinoma) cells were purchased from Korean Cell Line Bank (Seoul, Korea). Cells were cultured in MEM (Eagle's Minimum Essential Medium) supplemented with 10 % fetal bovine serum, 100 U/ml penicillin and 100 U/ml streptomycin and cells were kept in 5 % CO<sub>2</sub> at 37 °C.

Cells were seeded in a 35-mm glass bottomed dishes at a density of 3 X 10<sup>5</sup> cells per dish in culture media. After overnight culture, HeLa cells were preincubated with 0.2 mM NMM (N-methylmaleimide) for 20 min and washed with DPBS and incubated with 200 μM cysteine, homocysteine and GSH-MEE (cell permeable form of GSH) for 20 min. After washing with DPBS, cells were stained with 20 μM TCF-GSH or TCFCl-GSH for 20 min and acquired fluorescence images by confocal microscopy (FV1200, Olympus). To get the fluorescence image, cells were irradiated with 559 nm laser and used 575-675 nm filter. All experiments were tested in the HBSS (Hanks' Balanced Salt Solution) to prevent another factor interference in the cell culture media.

To reduce intracellular thiol concentrations, cells were treated with 500 μM H<sub>2</sub>O<sub>2</sub> or 200 μM cisplatin for 6 hr and 2 mM NAC (N-acetylcysteine) was cotreated to recover this effect.

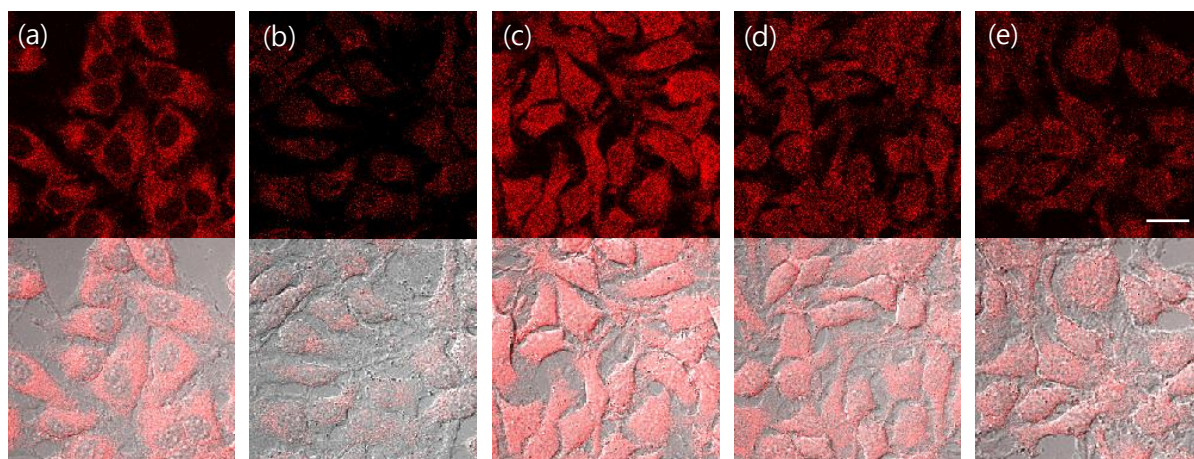

**Fig S18.** Fluorescence imaging in the live cell. HeLa cells were preincubated with 0.2 mM NMM for 20 min and washed with DPBS and incubated with 200 μM cysteine, homocysteine and GSH-MEE for 20 min. After washing with DPBS, cells were stained with 20 μM TCF-GSH for 20 min and acquired fluorescence images by confocal microscopy. (a) only **TCF-GSH**, (b) **NMM + TCF-GSH**, (c) **NMM + cysteine + TCF-GSH**, (d) **NMM + homocysteine + TCF-GSH** and (e) **NMM + GSH-MEE + TCF-GSH**. Top : fluorescence image (ex. 559 nm/em. 575-675 nm), bottom : merged image with DIC. Scale bar. 20 μm.

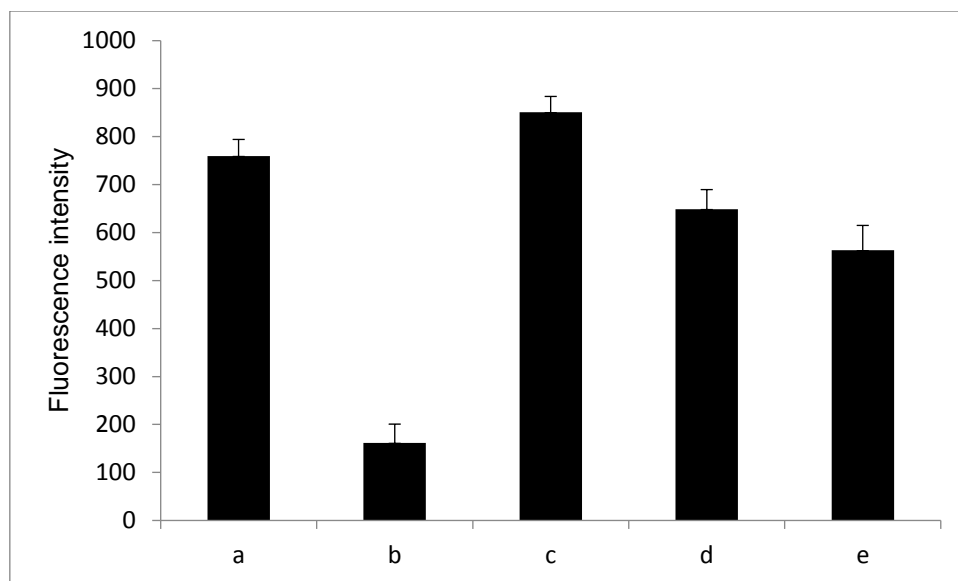

**Fig S19.** Quantitative data of the above Figure S18. Fluorescence intensity was calculated by FV10-ASW 4.0 software and measured per one cell. Results are expressed as mean  $\pm$  standard deviation of three independent experiments.

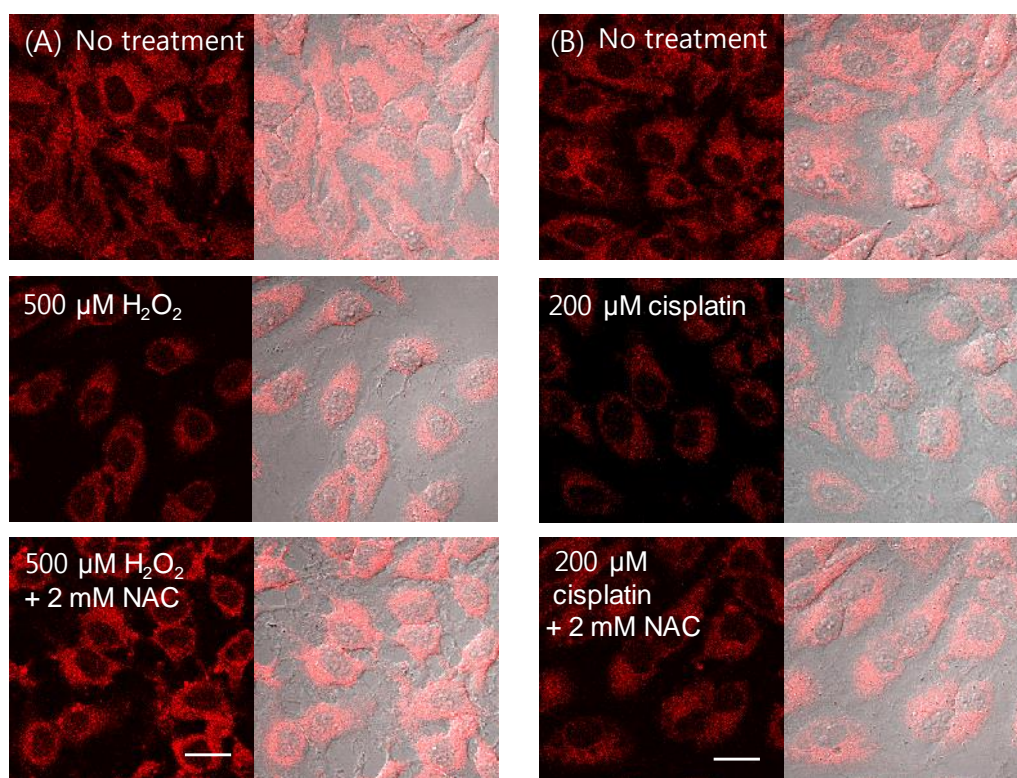

**Fig S20.** Intracellular fluorescence change by drug treatment. (A) HeLa cells were incubated with 500  $\mu$ M  $H_2O_2$  with or without 2 mM NAC for 6 hr and stained with 20  $\mu$ M TCF-GSH for 20 min. (B) HeLa cells were incubated with 200  $\mu$ M cisplatin with or without 2 mM NAC for 6 hr and stained with 20  $\mu$ M TCF-GSH for 20 min. Ex. 559 nm/em. 575 – 675 nm. Scale bar : 20  $\mu$ m.

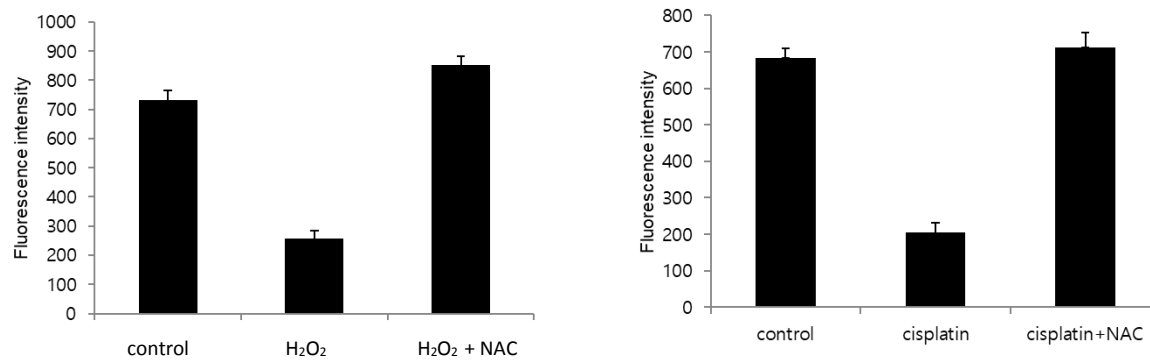

**Fig S21.** Quantitative data of Fig. S20. Fluorescence intensity was calculated by FV10-ASW 4.0 software and measured per one cell. Results are expressed as mean  $\pm$  standard deviation of three independent experiments

## 7. Photobleaching experiments

As shown below in Fig. S22 and S23, photobleaching experiments were carried out against the known biological dye 4',6-diamidino-2-phenylindole (DAPI). The cells were continuously irradiated and the fluorescence intensity was measured over time. Both TCF-based fluorophores displayed good photostability against DAPI with **TCFCI-GSH** having the best photostability.

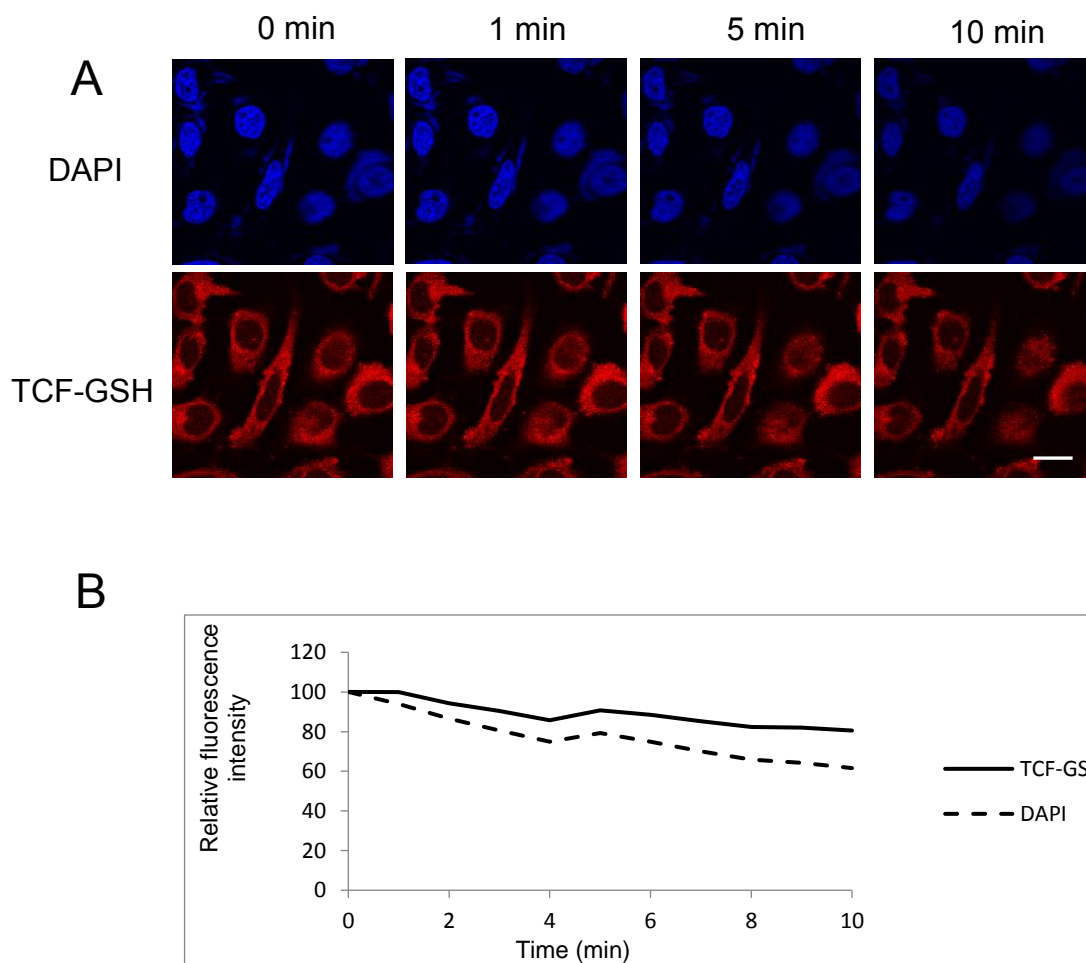

**Fig S22.** Photobleaching experiments of the **TCF-GSH** in HeLa cells. (A) Cells were costained with **TCF-GSH** and DAPI and acquired fluorescence image by time-dependent manner. Cells were continuously irradiated with laser and the total fluorescence intensity was recorded at every 1 min. Laser power (DAPI : ex. 405 nm/ 50%, **TCF-GSH** : ex. 559 nm/ 50%). Scale bar : 20  $\mu$ m. (B) Quantitative photobleaching results from (A). Fluorescence Intensity of 0 min was calculated as 100 %.



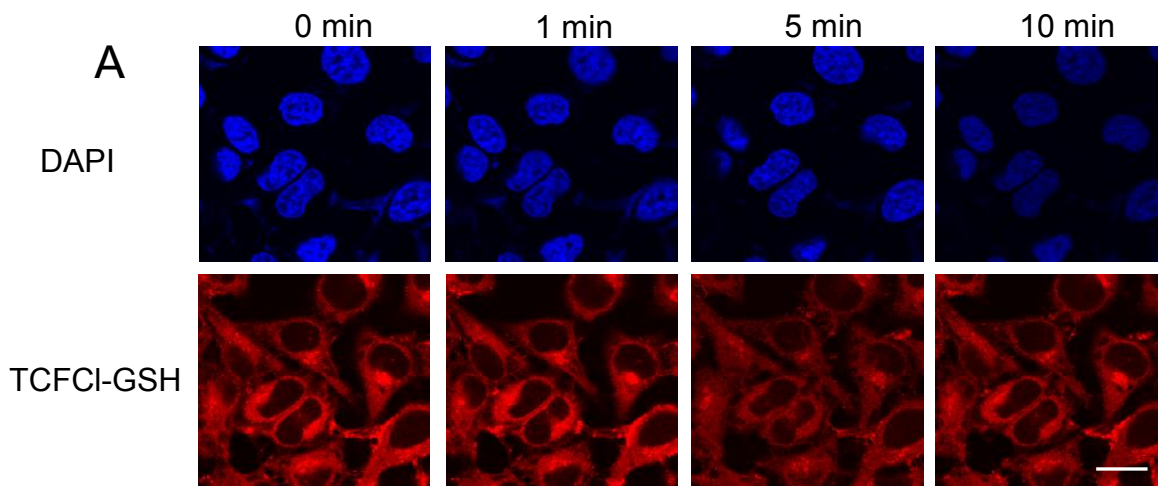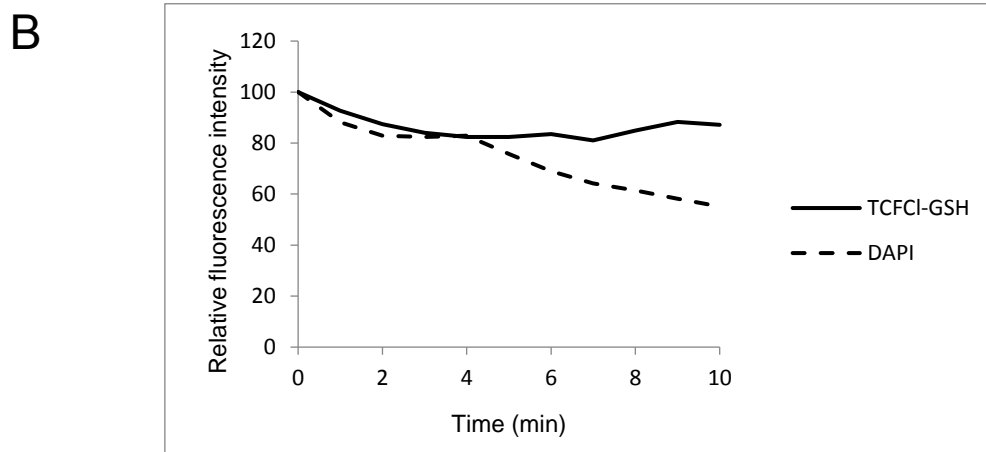

**Fig S23.** Photobleaching experiments of the **TCFCI-GSH** in HeLa cells. (A) Cells were costained with **TCFCI-GSH** and DAPI and acquired fluorescence image by time-dependent manner. Cells were continuously irradiated with laser and the total fluorescence intensity was recorded at every 1 min. Laser power (DAPI : ex. 405 nm/ 50%, **TCFCI-GSH** : ex. 559 nm/ 50%). Scale bar : 20  $\mu$ m. (B) Quantitative photobleaching results from (A). Fluorescence Intensity of 0 min was calculated as 100 %.

## 8. Quantum Yield and Limit of Detection

Table S1 – Quantum Yields for TCF-GSH, TCFCl-GSH, TCF-CIO<sup>-</sup> and TCFO<sup>-</sup>

| Probe                    | $\Phi$                |
|--------------------------|-----------------------|
| TCF-GSH <sup>(a)</sup>   | $1.28 \times 10^{-4}$ |
| TCFCl-GSH <sup>(b)</sup> | $6.34 \times 10^{-4}$ |
| TCF-O <sup>(c)</sup>     | $2 \times 10^{-3}$    |
| TCFCl-O <sup>(c)</sup>   | 0.012                 |

(a) The quantum yield of TCF-GSH was estimated by dividing  $\Phi_{\text{TCFO}^-}$  by the 15.63-fold intensity increase for TCF-GSH at 615 nm for the addition of GSH (63  $\mu\text{M}$ ). (b) The quantum yield of TCFCl-GSH was estimated by dividing  $\Phi_{\text{TCFCl-O}^-}$  by the 18.94-fold intensity increase for TCFCl-GSH at 625 nm for the addition of GSH (750  $\mu\text{M}$ ). (c) The quantum yield of TCFO<sup>-</sup> ( $\Phi_{\text{TCFO}^-}$ ) and TCFClO<sup>-</sup> ( $\Phi_{\text{TCFClO}^-}$ ) were previously reported.<sup>2</sup>

### Limit of detection

The limit of detection was calculated using the formula shown below:

$$\text{Limit of detection (LOD)} = 3\sigma/\text{slope}$$

$\sigma$  = Standard deviation of the lowest concentration

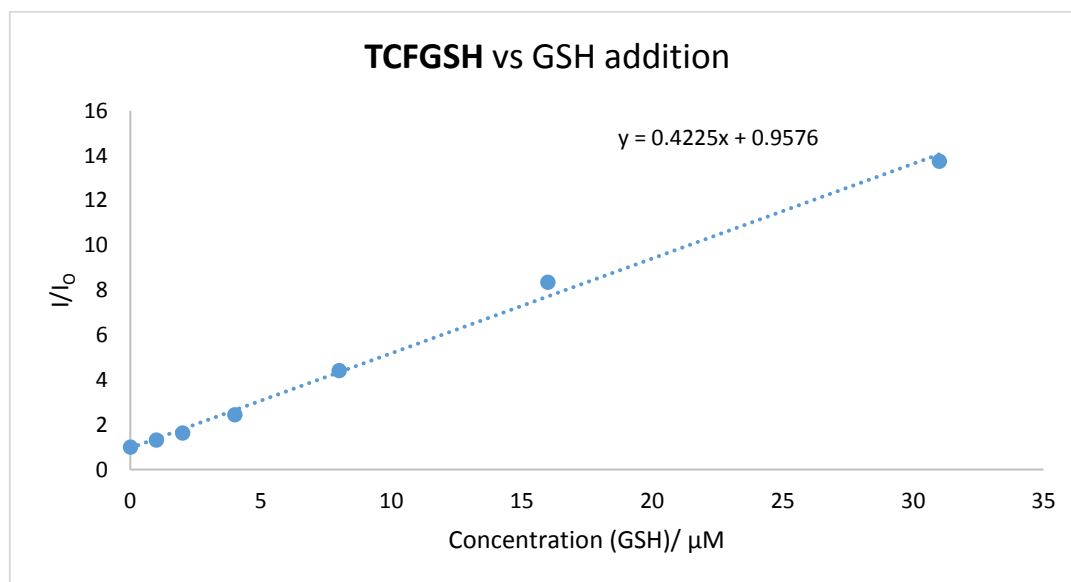

Fig S24. Fluorescence intensity changes of TCF-GSH with the addition of GSH in PBS buffer solution, 20 % DMSO, pH 8.00 at 25 °C.  $\lambda_{\text{ex}} = 560 \pm 15 \text{ nm}$  /  $\lambda_{\text{em}} = 615 \text{ nm}$

$$\text{LOD for TCF-GSH} = (3 \times 0.0396)/0.4225 = 0.28 \mu\text{M}$$

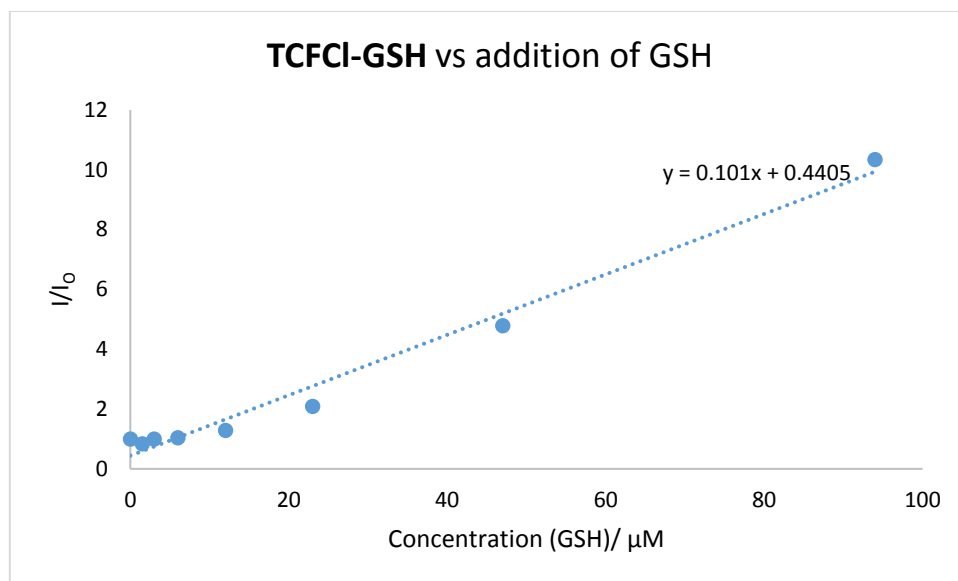

**Fig S25.** Fluorescence intensity changes of **TCFCI-GSH** with the addition of GSH in PBS buffer solution, 20 % v/v DMSO, pH 8.00 at 25 °C.  $\lambda_{ex} = 560 \pm 15 \text{ nm}$  /  $\lambda_{em} = 625 \text{ nm}$

$$\text{LOD for TCFCI-GSH} = (3 \times 0.0153) / 0.101 = 0.45 \mu\text{M}$$

## 9. Experimental

### 2-(3-cyano-4,5,5-trimethylfuran-2(5H)-ylidene)malonitrile (1)

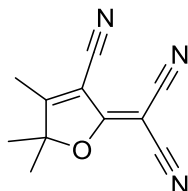

NaOEt (0.391 g, 5.75 mmol) was added to a solution of 3-hydroxy-3-methyl-2-butanone (4 mL, 38 mmol) and malonitrile (4.9 g, 74 mmol) in EtOH (10 mL) and stirred for 1.5 h. The reaction mixture was then refluxed for 1 h, which was then cooled to rt. The mixture was cooled and the solid precipitate was filtered to afford the title compound as a pale grey solid (4.92 g, 24.70 mmol, 65 %); M.p. 204 – 208 °C (decomp). <sup>1</sup>H NMR (500 MHz, CDCl<sub>3</sub>) δ 2.37 (s, 3 H), 1.64 (s, 6 H); <sup>13</sup>C NMR (75.5 MHz, CDCl<sub>3</sub>) δ 182.6, 175.2, 111.1, 110.4, 109.0, 104.8, 99.8, 58.5, 24.4, 14.2; IR (thin film) ν max (cm<sup>-1</sup>): 2232.78, 2222.00 (CN); HRMS (FTMS-NSI): m/z calculated for C<sub>11</sub>H<sub>9</sub>N<sub>3</sub>O: requires 200.0108 for [M+H]<sup>+</sup>, found 200.0108.

**(E)-2-(3-cyano-4-(4-hydroxystyryl)-5,5-dimethylfuran-2(5H)-ylidene)malononitrile (2)**

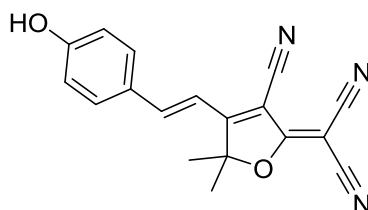

Two drops of piperidine were added to a mixture of 4-hydroxybenzaldehyde (0.122 g, 1 mmol) and TCF (0.228 g, 1.15 mmol) in EtOH (10 mL). The reaction mixture was heated in the microwave for 15 min at 100 °C, which was then cooled to rt. The solid precipitate was filtered off to afford the title compound as an orange solid (0.218 g, 0.72 mmol, 72 %) M.p. 202 – 206 °C (decomp). <sup>1</sup>H NMR (300MHz, DMSO-d<sub>6</sub>) 7.95 - 7.73 (m, 3 H), 7.01 (d, *J* = 16.2 Hz, 1 H), 6.89 (d, *J* = 8.7 Hz, 2 H), 1.77 (s, 6 H); <sup>13</sup>C NMR (75.5 MHz, DMSO-d<sub>6</sub>) δ 177.6, 176.2, 162.7, 148.7, 132.7, 126.0, 116.8, 113.3, 112.5, 112.0, 111.6, 99.4, 96.9, 53.5, 25.7; IR (thin film) ν<sub>max</sub> (cm<sup>-1</sup>): 3361.61 (O-H), 2224.73 (CN); HRMS (FTMS-NSI): *m/z* calculated for C<sub>18</sub>H<sub>13</sub>N<sub>3</sub>O<sub>2</sub>: requires 304.1081 for [M+H]<sup>+</sup>, found 304.1084.

**(E)-4-(2-(4-cyano-5-(dicyanomethylene)-2,2-dimethyl-2,5-dihydrofuran-3yl)vinyl)phenyl 2,4-dinitrobenzenesulfonate (3)**

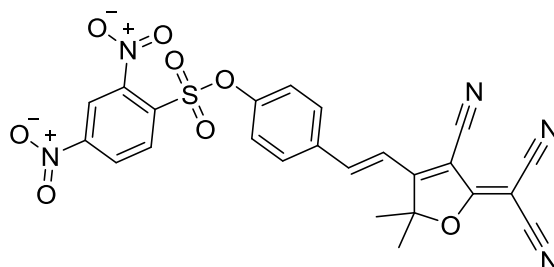

**2** (0.10 g, 0.33 mmol) was dissolved in DCM (5 mL) followed by the addition of  $\text{NEt}_3$  (89  $\mu\text{L}$ , 0.66 mmol). The reaction mixture was cooled to 0 °C and 2,4-dinitrobenzenesulfonylchloride (0.11 g, 0.40 mmol) in DCM (5 mL) was added dropwise to the reaction mixture. The reaction was allowed to warm to rt and was stirred for a further 4 hrs. The solvent was removed *in vacuo* and the crude product was purified *via* column chromatography - EtOAc:Pet ether (20::80 to 60:40). The title compound was isolated as an orange solid (0.08 g, 0.15 mmol, 45 %). M.p . – 236 – 238 °C;  $^1\text{H}$  NMR (300 MHz,  $\text{DMSO-d}_6$ )  $\delta$  9.13 (d,  $J = 2.3$  Hz, 1 H), 8.59 (dd,  $J = 2.3$ , 8.7 Hz, 1 H), 8.24 (d,  $J = 8.7$  Hz, 1 H), 7.99 (d,  $J = 8.9$  Hz, 2 H), 7.87 (d,  $J = 16.8$  Hz, 1 H), 7.32 (d,  $J = 8.9$  Hz, 2 H), 7.21 (d,  $J = 16.6$  Hz, 1 H), 1.77 (s, 6 H);  $^{13}\text{C}$  NMR (125.75 MHz, Acetone- $\text{d}_6$ )  $\delta$  176.3, 174.4, 151.0, 144.7, 134.7, 134.0, 131.9, 131.1, 127.2, 123.0, 120.9, 117.0, 111.9, 111.2, 110.2, 101.4, 99.1, 25.0; I.R (thinfilm)  $\nu$  max ( $\text{cm}^{-1}$ ): 3100 (C-H  $\text{sp}^2$ ), 2229.72 (CN); HRMS (FTMS-NSI):  $m/z$  calculated for  $\text{C}_{24}\text{H}_{15}\text{N}_5\text{O}_8\text{S}$ : requires 534.0714 for  $[\text{M}+\text{H}]^+$ , found 534.0720

**(E)-2-(3-cyano-4-(3,5-dichloro-4-hydroxystyryl)-5,5-dimethylfuran-2(5H)-ylidene)malononitrile (4)**

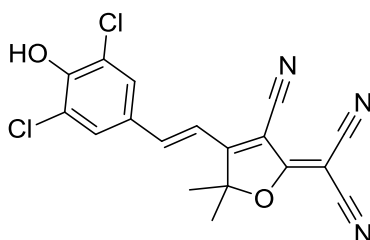

Two drops of piperidine were added to a mixture of 3,5-dichloro-4-hydroxybenzaldehyde (0.19 g, 1 mmol) and TCF (0.20 g, 1.00 mmol) in EtOH (10 mL). The reaction mixture was heated in the microwave for 15 min at 100 °C, which was then cooled to rt. The solid precipitate was filtered off to afford the title compound as a blue solid (0.19 g, 0.50 mmol, 50 %). M.p. - > 300 °C; <sup>1</sup>H NMR (500 MHz, DMSO-d<sub>6</sub>) δ 8.06 (s, 2 H), 7.76 (d, *J* = 16.1 Hz, 1 H), 7.19 (d, *J* = 16.1 Hz, 1 H), 1.77 (s, 6 H); <sup>13</sup>C NMR (125.75 MHz, DMSO-d<sub>6</sub>) δ 177.5, 175.4, 153.2, 145.4, 130.4, 127.6, 123.3, 115.1, 113.2, 112.3, 111.2, 99.7, 25.6; I.R (thin film) ν max (cm<sup>-1</sup>): 3356.50 (Br O-H), 2212.91 (CN); HRMS (ASAP+): *m/z* calculated for C<sub>18</sub>H<sub>11</sub>Cl<sub>2</sub>N<sub>3</sub>O<sub>2</sub>: requires 372.0307 for [M+H]<sup>+</sup>, found 372.0300

**(E)-2,6-dichloro-4-(2-(4-cyano-5-(dicyanomethylene)-2,2-dimethyl-2,5-dihydrofuran-3-yl)vinyl)phenyl 2,4-dinitrobenzenesulfonate (5)**

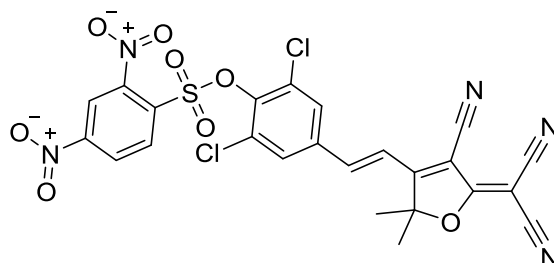

**4** (0.17 g, 0.46 mmol) was dissolved in DCM (5 mL) followed by the addition of NEt<sub>3</sub> (124 μL, 0.92 mmol). The reaction mixture was cooled to 0 °C and 2,4-dinitrobenzenesulfonylchloride (0.146 g, 0.55 mmol) in DCM (5 mL) was added dropwise to the reaction mixture. The reaction was allowed to warm to rt and was stirred for a further 4 hrs. The solvent was removed *in vacuo* and the crude product was purified *via* column chromatography - EtOAc:Pet ether (60:40). The title compound was isolated as a yellow solid (0.20 g, 0.33 mmol, 72 %). M.P. – 268 -272 °C; <sup>1</sup>H NMR (500 MHz, DMSO-d<sub>6</sub>) δ 9.12 (d, *J* = 2.4 Hz, 1 H), 8.70 (dd, *J* = 2.4, 8.8 Hz, 1 H), 8.49 (d, *J* = 8.8 Hz, 1 H), 8.34 (s, 2 H), 7.76 (d, *J* = 16.6 Hz, 1 H), 7.44 (d, *J* = 16.6 Hz, 1 H), 1.80 (s, 6 H); <sup>13</sup>C NMR (125.75 MHz, DMSO-d<sub>6</sub>) δ 177.3, 174.2, 152.1, 148.2, 143.7, 142.6, 136.5, 133.6, 133.4, 130.5, 129.9, 128.3, 121.6, 119.7, 112.9, 112.1, 110.7, 102.4, 100.1, 56.0, 25.4; I.R (thinfilm) ν max (cm<sup>-1</sup>): 3112.22 (C-H sp<sup>2</sup>), 2225.72 (CN); HRMS (FTMS-NSI): m/z calculated for C<sub>24</sub>H<sub>13</sub>Cl<sub>2</sub>N<sub>5</sub>O<sub>8</sub>S: requires 623.9754 for [M+Na]<sup>+</sup>, found 623.9761



## 10. NMR

### 2-(3-cyano-4,5,5-trimethylfuran-2(5H)-ylidene)malononitrile (1) (500 MHz, CDCl<sub>3</sub>)

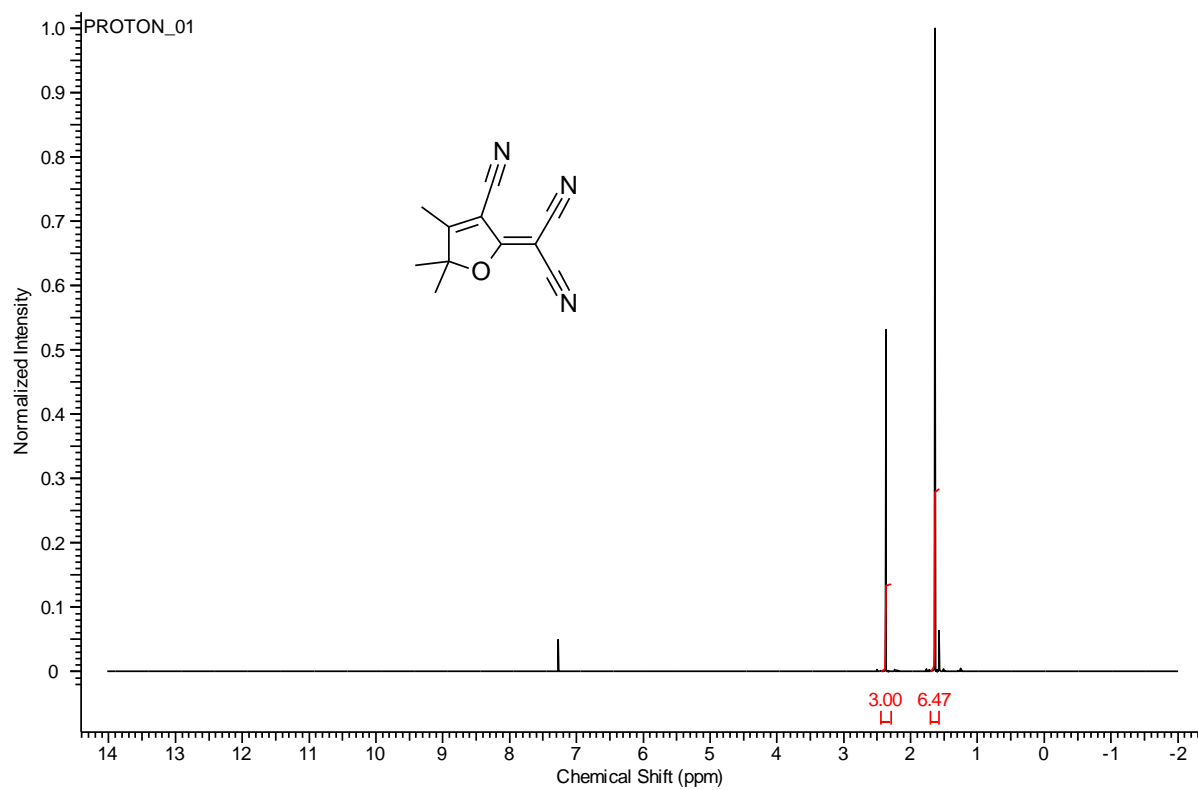

**2-(3-cyano-4,5,5-trimethylfuran-2(5H)-ylidene)malononitrile (1) (75.5 MHz, CDCl<sub>3</sub>)**

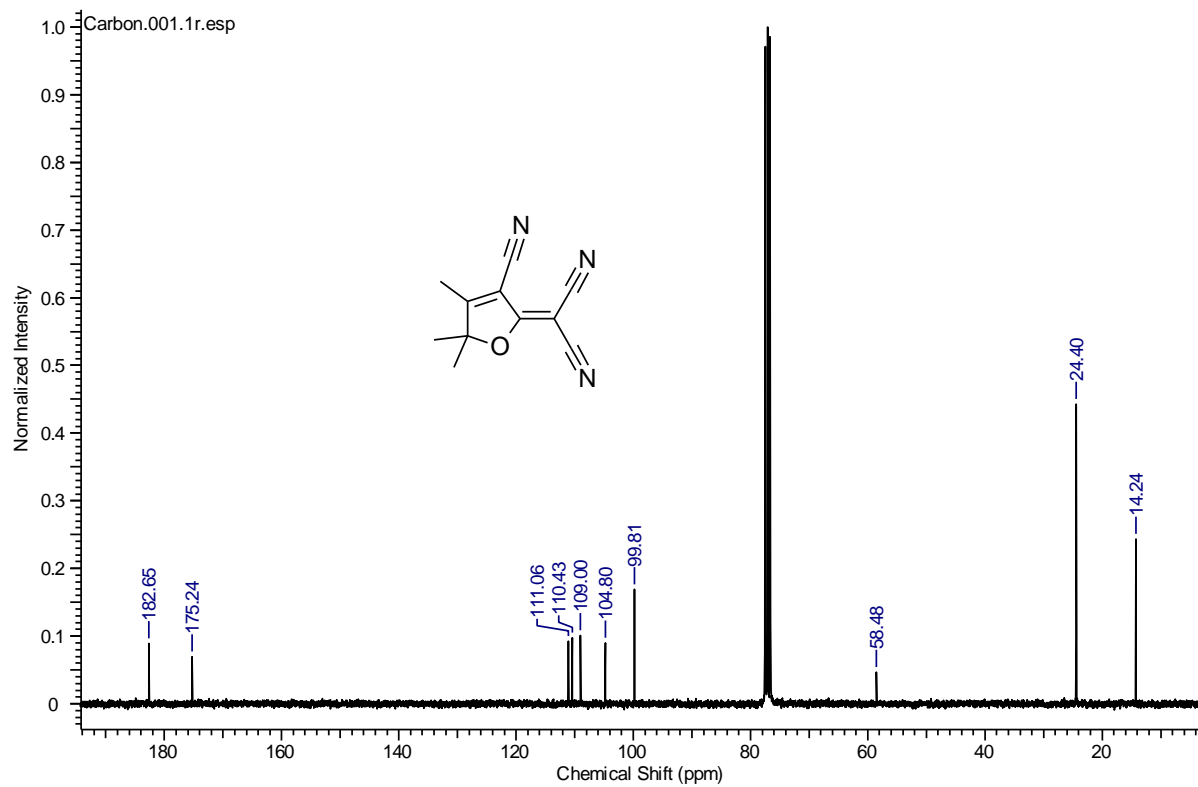

**(E)-2-(3-cyano-4-(4-hydroxystyryl)-5,5-dimethylfuran-2(5H)-ylidene)malononitrile (2)**  
(300 MHz, CDCl<sub>3</sub>)

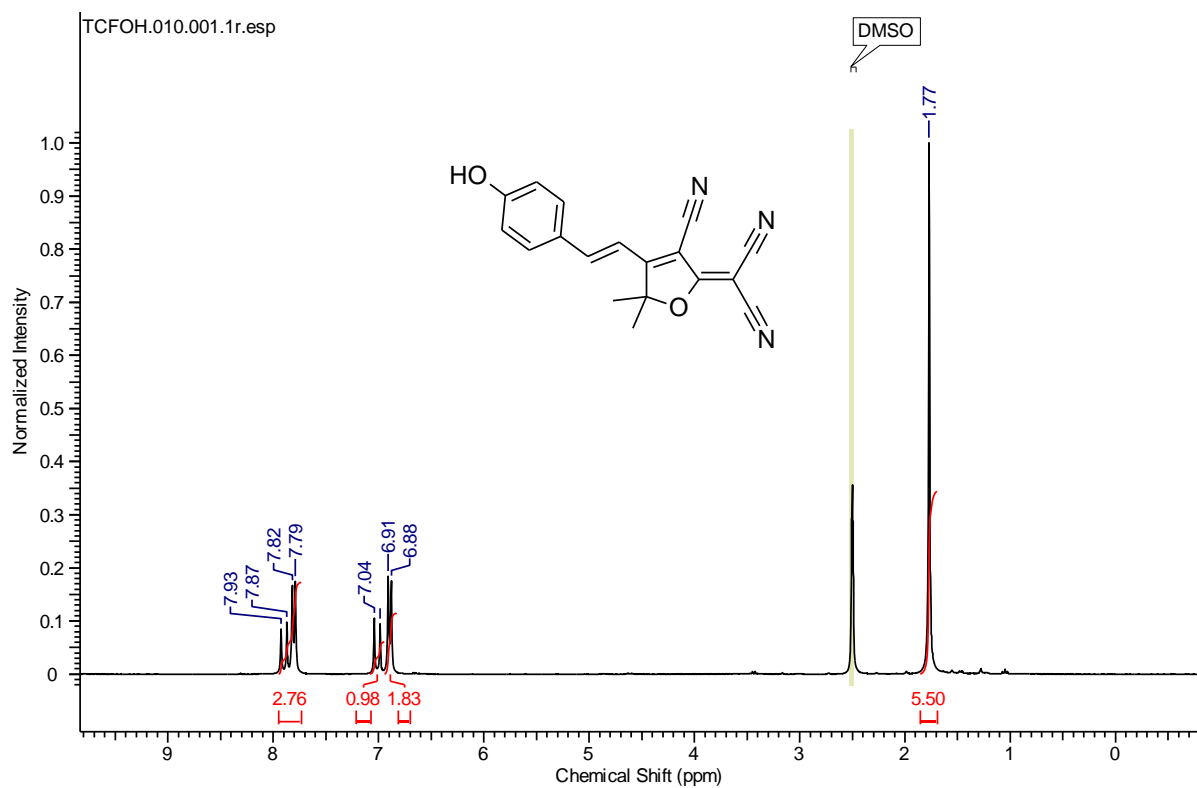

**(E)-2-(3-cyano-4-(4-hydroxystyryl)-5,5-dimethylfuran-2(5H)-ylidene)malononitrile (2)**  
(75.5 MHz, CDCl<sub>3</sub>)

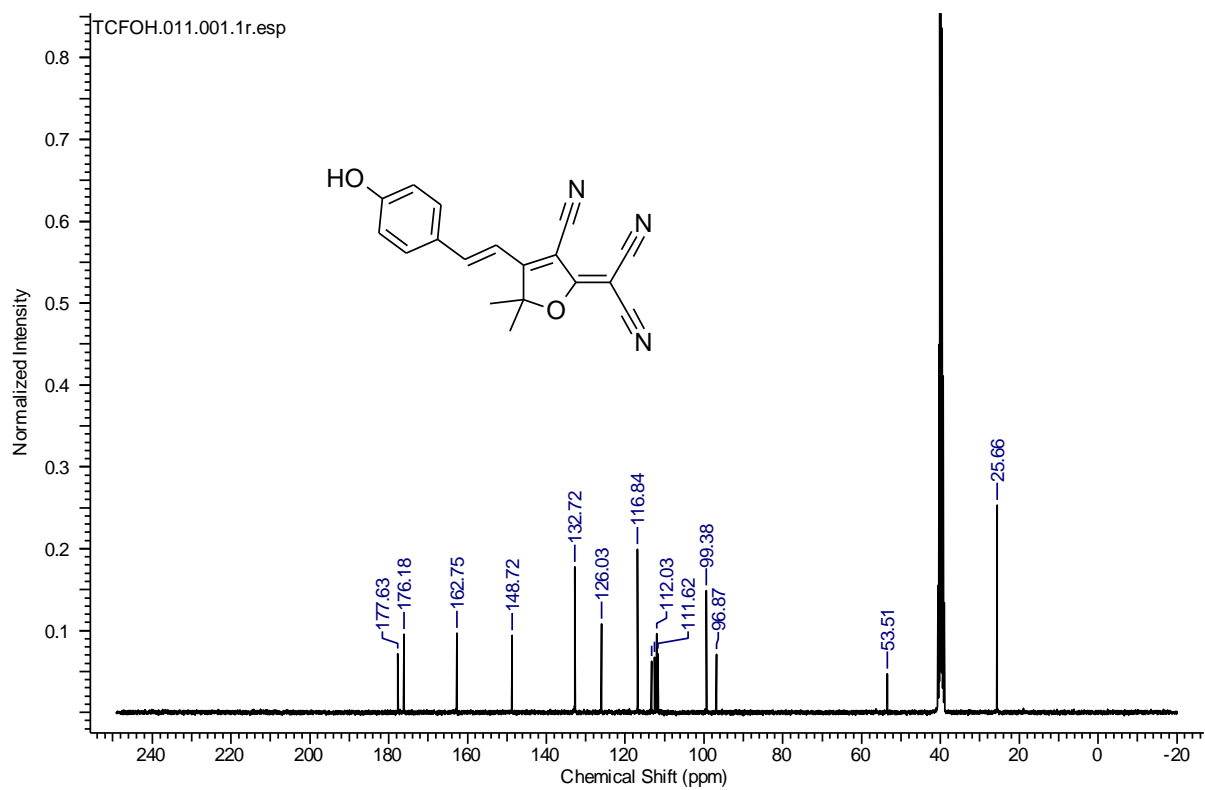

**(E)-4-(2-(4-cyano-5-(dicyanomethylene)-2,2-dimethyl-2,5-dihydrofuran-3yl)vinyl)phenyl 2,4-dinitrobenzenesulfonate (3)** (300 MHz, DMSO-d6)

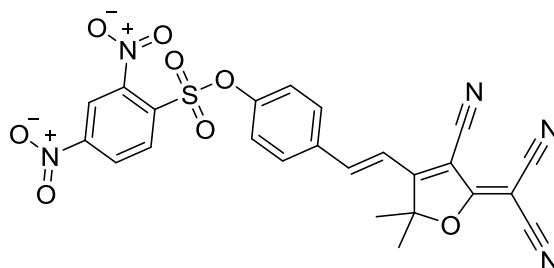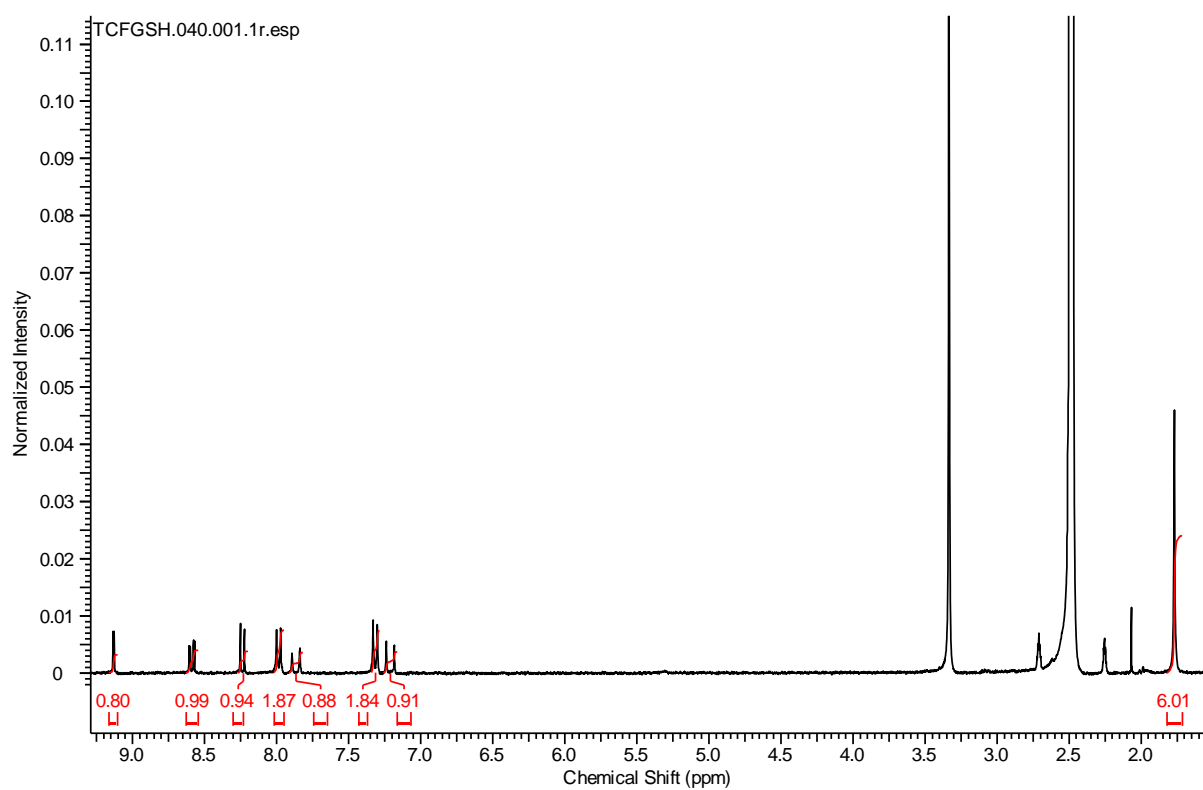

**(E)-4-(2-(4-cyano-5-(dicyanomethylene)-2,2-dimethyl-2,5-dihydrofuran-3yl)vinyl)phenyl  
2,4-dinitrobenzenesulfonate (3)** (125.75 MHz, DMSO-d6)

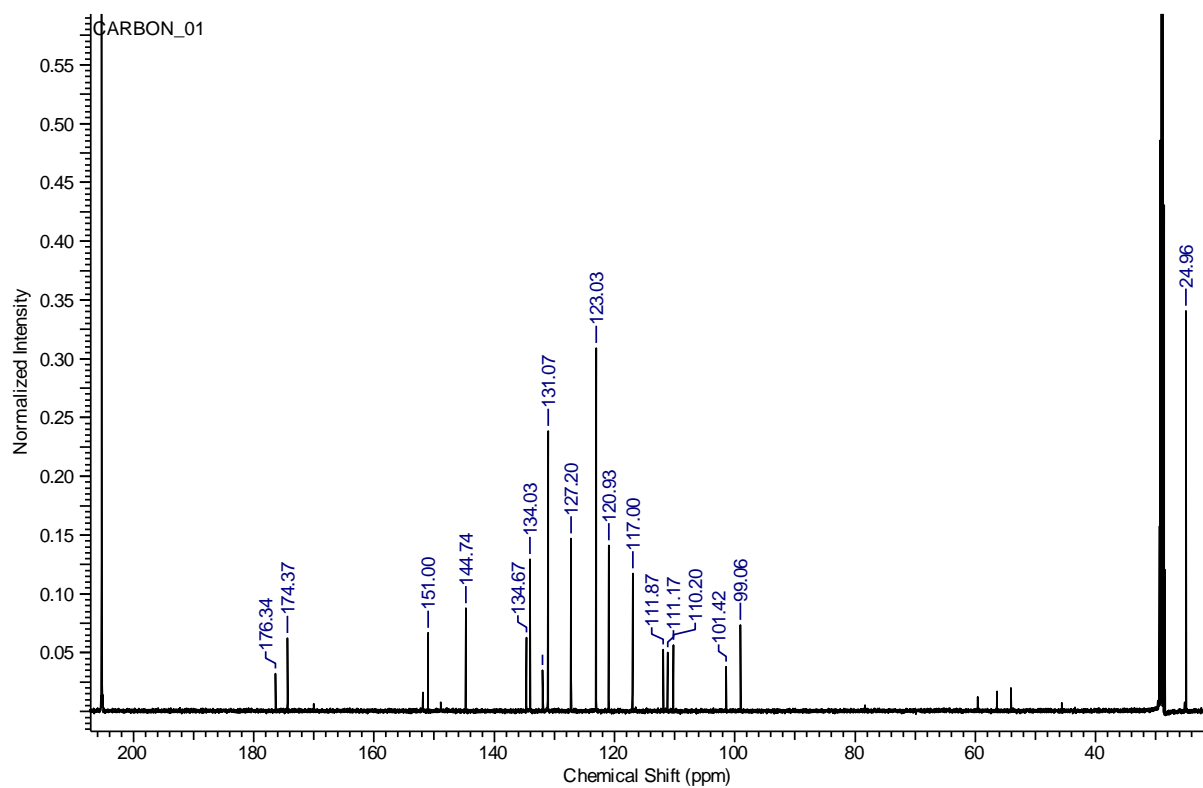

**(E)-2-(3-cyano-4-(3,5-dichloro-4-hydroxystyryl)-5,5-dimethylfuran-2(5H)ylidene)malononitrile (4)** (500 MHz, DMSO-d6)

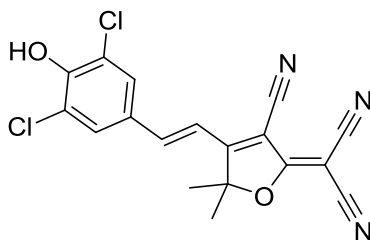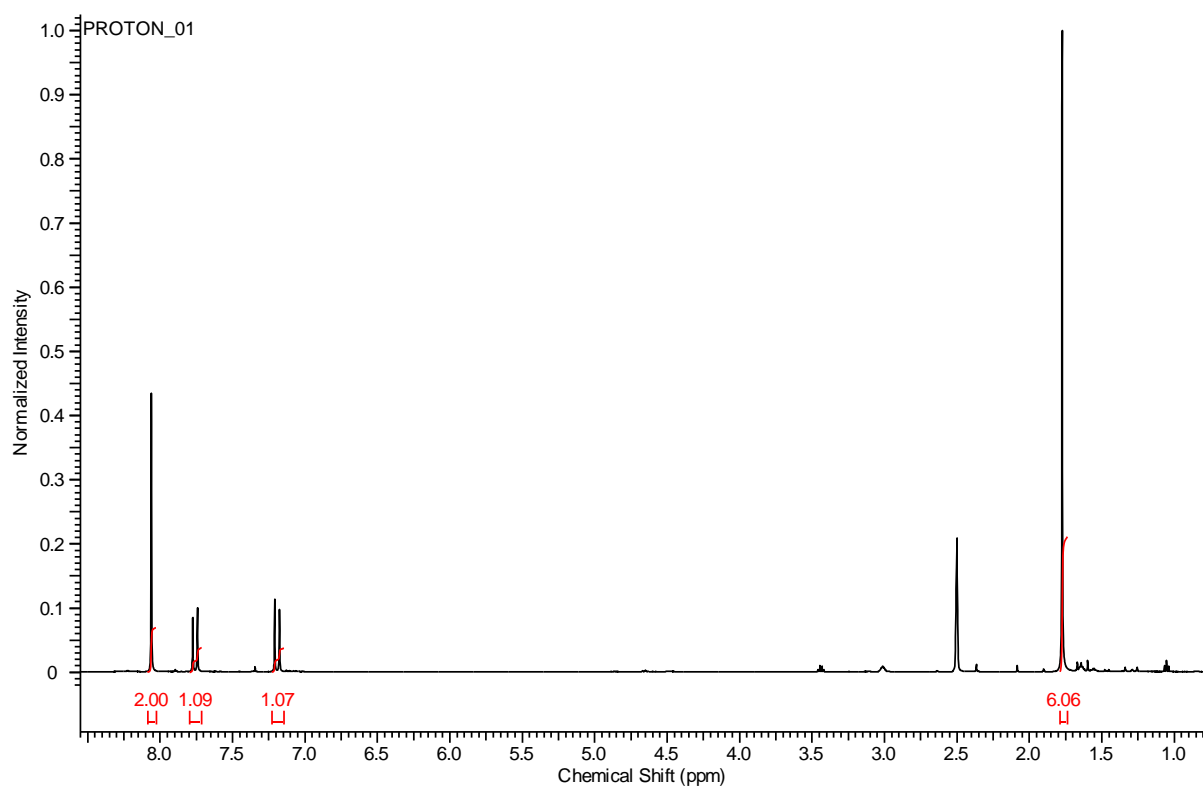

**(E)-2-(3-cyano-4-(3,5-dichloro-4-hydroxystyryl)-5,5-dimethylfuran-2(H)ylidene)malononitrile (4)** (125.75 MHz, DMSO-d6)

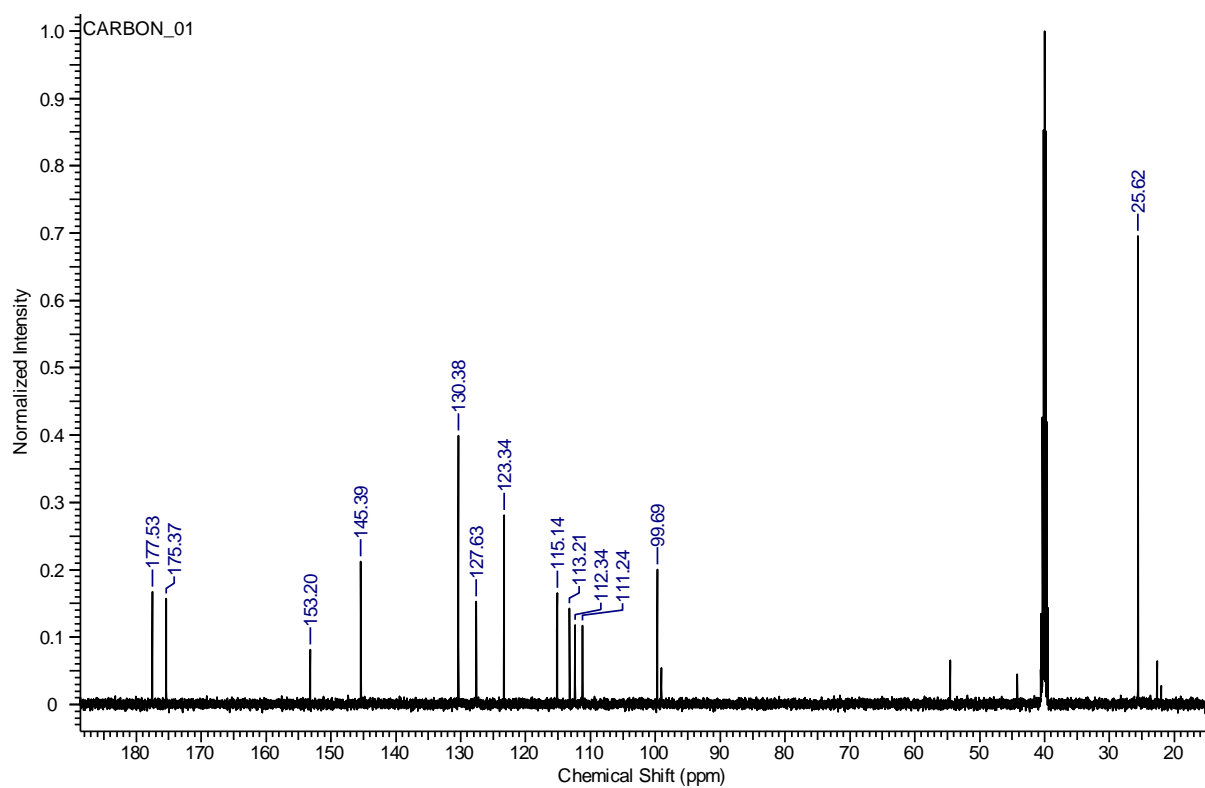



**(E)-2,6-dichloro-4-(2-(4-cyano-5-(dicyanomethylene)-2,2-dimethyl-2,5-dihydrofuran-3-yl)vinyl)phenyl 2,4-dinitrobenzenesulfonate (5)** (500 MHz, DMSO-d6)

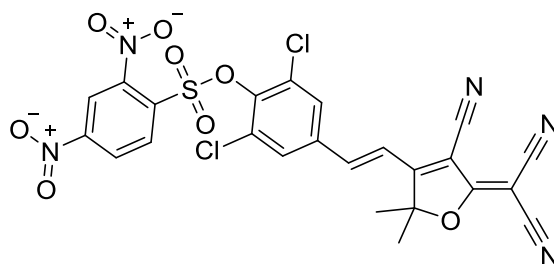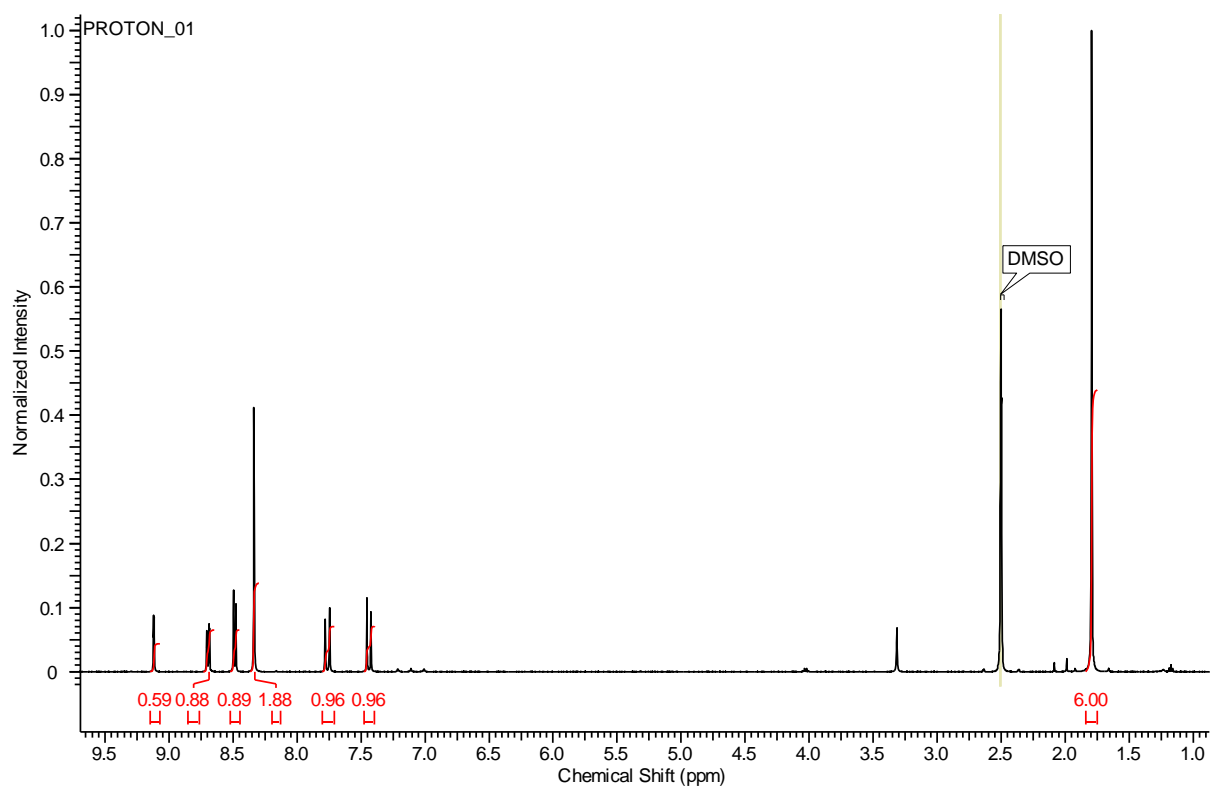

**(E)-2,6-dichloro-4-(2-(4-cyano-5-(dicyanomethylene)-2,2-dimethyl-2,5-dihydrofuran-3-yl)vinyl)phenyl 2,4-dinitrobenzenesulfonate (5)** (125.75 MHz, DMSO-d<sub>6</sub>)

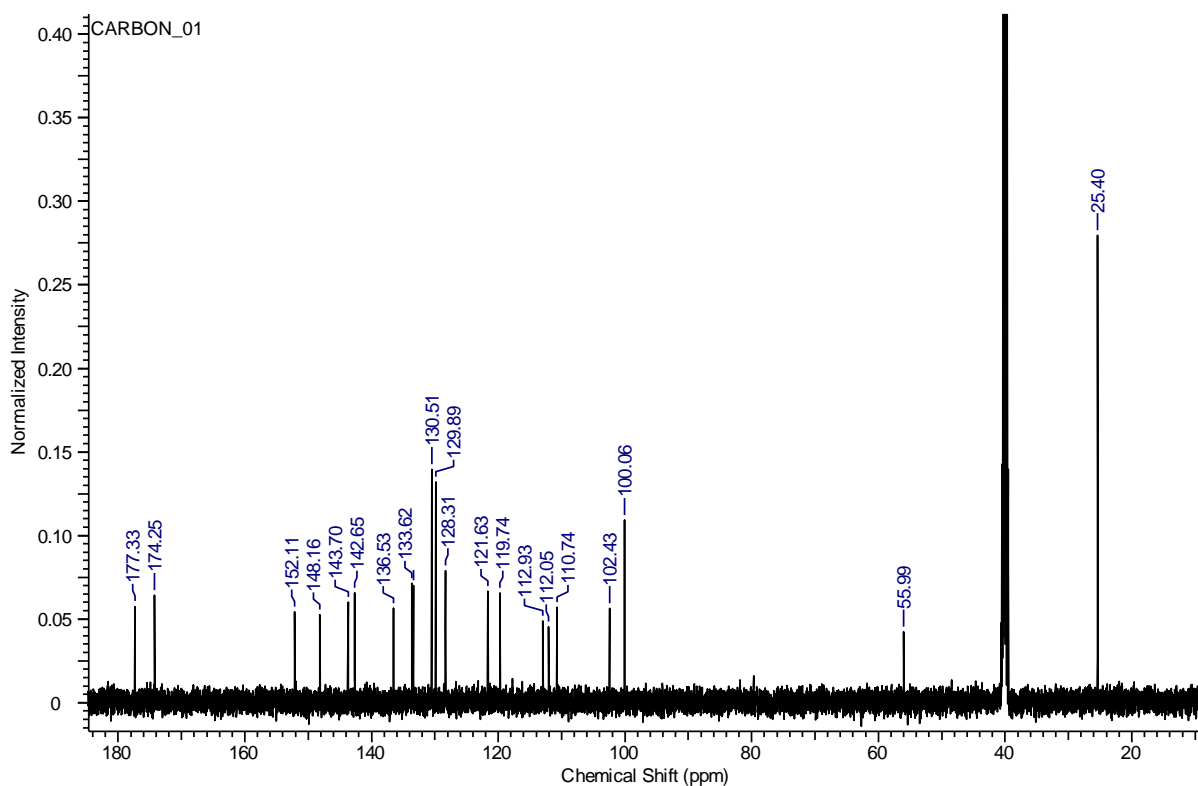

## 11. References

- (1) Zhu, B. C.; Kan, H.; Liu, J. K.; Liu, H. G.; Wei, Q.; Du, B. A highly selective ratiometric visual and red-emitting fluorescent dual-channel probe for imaging fluoride anions in living cells. *Biosens. Bioelectron.* **2014**, *52*, 298.
- (2) Ipuý, M.; Billon, C.; Micouin, G.; Samarut, J.; Andraud, C.; Bretonniere, Y. Fluorescent push-pull pH-responsive probes for ratiometric detection of intracellular pH. *Org. Biomol. Chem.* **2014**, *12* (22), 3641.
